# Supplementary material
Source: publisher figshare collection journal article supplement (https://karger.figshare.com/ndownloader/files/29169414)
Supplement: Supplementary file 1 [file 29169414]

**Autophagy prevents osteocyte cell death under hypoxic conditions.**Authors: Mai Kurihara, Yoshiki Mukudai, Hitoshi Watanabe et al

**Supplementary Figure Legend**

Supplementary Fig S1. Induction of HIF-1a by hypoxia in MLO-Y4 cells. The cells were seeded on a type-I-collagen-coated slide chamber and exposed to normoxia (PO2 = 20%) and hypoxia (PO2 = 1, 2, and 4%). After 24 h, cells were subjected to IF for HIF-1a and DAPI staining. The bottom panels show merged images. Bars, 50 μm.

Supplementary Fig. S2. Measurements of live and dead cells under hypoxia or normoxia at 0 or 48 h. Cells were seeded on a type-I-collagen-coated slide chamber and exposed to normoxia (PO2 = 20%) and hypoxia (PO2 = 2%) for control (0 h, black) or the presence (red) or absence (black) of 3MA. The value at time 0 was designated as 1, and relative values are shown.

Supplementary Fig. S3. Measurements of live cells and dead cells under hypoxia or normoxia at 0 h or 48 h. Cells were seeded on a type-I-collagen-coated slide chamber and exposed to normoxia or hypoxia (PO2 = 2%) for the control (0 h, black) or in the presence (yellow) or absence (red) of 3MA with E2 and the presence (green) or absence (blue) of 3MA with VitD. The value at time 0 was designated as 1, and relative values are shown.
